# Supplementary material for: Ghrelin Upregulates Oncogenic Aurora A to Promote Renal Cell Carcinoma Invasion
Source: Cancers (Basel). 2019 Mar 4;11(3):303. doi: 10.3390/cancers11030303 (PMC6468656; doi:10.3390/cancers11030303)
Supplement: Supplementary file 1 [file cancers-11-00303-s001.xlsx]

## Sheet: 工作表1
Probe	Symbol	GHRL high-low (log2 transformed)	TTEST
201859_at	SRGN	3.77845	0.0135732
201858_s_at	SRGN	3.4387	0.0235487
214974_x_at	CXCL5	3.34167	0.0143251
215101_s_at	CXCL5	2.96948	0.0177605
215704_at	FLG	2.80223	0.00882197
225681_at	CTHRC1	2.78443	0.0352752
201069_at	MMP2	2.55232	0.00829016
205207_at	IL6	2.54192	0.00880972
226905_at	FAM101B	2.48172	0.0260749
202436_s_at	CYP1B1	2.4202	0.00618334
213524_s_at	G0S2	2.40051	0.0344393
202437_s_at	CYP1B1	2.30905	0.00858111
203889_at	SCG5	2.28478	0.00408173
229390_at	FAM26F	2.25958	0.00676396
222877_at		2.20556	0.00442272
226751_at	CNRIP1	2.14237	0.00507896
202435_s_at	CYP1B1	2.11393	0.00388898
222934_s_at	CLEC4E	2.09364	0.00999284
223204_at	FAM198B	2.08791	0.00124152
229391_s_at	FAM26F	2.05331	0.0148124
226834_at		2.01445	0.0190852
226876_at	FAM101B	1.9934	0.0156782
236044_at	PPAPDC1A	1.99105	0.00778509
229225_at	NRP2	1.98199	0.00574108
213139_at	SNAI2	1.9491	0.0223296
202766_s_at	FBN1	1.91736	0.0254827
204470_at	CXCL1	1.90451	0.0432402
214632_at	NRP2	1.90295	0.00275303
219295_s_at	PCOLCE2	1.88657	0.0177277
219557_s_at	NRIP3	1.88054	0.0217876
211844_s_at	NRP2	1.86101	0.00331486
212386_at	TCF4	1.80521	0.0139726
230250_at	PTPRB	1.80185	0.00171798
206785_s_at	KLRC1///KLRC2	1.79218	0.00420779
239201_at	CDK15	1.78488	0.0385388
208607_s_at	SAA1///SAA2///SAA2-SAA4	1.77014	0.0420592
210367_s_at	PTGES	1.75428	0.00998502
219983_at	HRASLS	1.75319	0.00156667
209946_at	VEGFC	1.74879	0.00261986
229641_at	CCBE1	1.74211	0.041383
205174_s_at	QPCT	1.7339	0.0464191
210845_s_at	PLAUR	1.72299	0.00547814
205066_s_at	ENPP1	1.72141	0.00380716
228372_at	C10orf128	1.71365	0.0253293
204955_at	SRPX	1.70468	0.0346492
202765_s_at	FBN1	1.7029	0.010551
225566_at	NRP2	1.69869	0.00800124
202508_s_at	SNAP25	1.6761	0.000728728
201645_at	TNC	1.67529	0.0320865
212382_at	TCF4	1.67186	0.00565254
214866_at	PLAUR	1.67013	0.00229003
219569_s_at	SLC35G2	1.63128	0.0310214
242138_at	DLX1	1.62765	0.00706237
211924_s_at	PLAUR	1.61001	0.00354194
212624_s_at	CHN1	1.60651	0.00246229
219863_at	HERC5	1.6021	0.0305622
209270_at	LAMB3	1.59694	0.0382145
227458_at	CD274	1.59683	0.0350637
210145_at	PLA2G4A	1.58335	0.0401775
214701_s_at	FN1	1.57813	0.0478202
228082_at	CLMP	1.57802	0.0131627
218217_at	SCPEP1	1.57556	0.043595
219367_s_at		1.55076	0.0120962
231098_at		1.5491	0.022907
205379_at	CBR3	1.54384	0.00430086
203753_at	TCF4	1.53535	0.00441695
206084_at	PTPRR	1.53473	0.000678606
210675_s_at	PTPRR	1.5317	0.000906751
226777_at	ADAM12	1.52853	0.0377875
219483_s_at	PORCN	1.52396	0.0208709
217979_at	TSPAN13	1.52265	0.0120884
210139_s_at	PMP22	1.51455	0.00695497
211071_s_at	MLLT11	1.51302	0.00846507
202434_s_at	CYP1B1	1.48783	0.00052306
211538_s_at	HSPA2	1.48392	0.00653198
209890_at	TSPAN5	1.48057	0.00881585
202952_s_at	ADAM12	1.47499	0.0302129
222900_at	NRIP3	1.47064	0.0184287
237460_x_at	C14orf182	1.47011	0.00331346
1558199_at	FN1	1.45902	0.0374233
205891_at	ADORA2B///LOC100652851///LOC100653318	1.45572	0.0239766
221766_s_at	FAM46A	1.44453	0.013426
213891_s_at	TCF4	1.43998	0.0162128
220254_at	LRP12	1.43381	0.00217206
220253_s_at	LRP12	1.42421	0.00370957
203298_s_at	JARID2	1.42159	0.00178582
235629_at		1.42125	0.0369489
239777_at	C14orf182	1.41759	0.00689882
1554474_a_at	MOXD1	1.39871	0.0177094
233587_s_at	SIPA1L2	1.39321	0.0169975
224973_at	FAM46A	1.38436	0.0202481
219855_at	NUDT11	1.38407	0.000625566
222146_s_at	TCF4	1.38271	0.00381345
235518_at	SLC8A1	1.37679	0.0201974
209708_at	MOXD1	1.37445	0.0185776
209610_s_at	SLC1A4	1.37305	0.0235127
1552846_s_at	RAB42	1.37298	0.0378353
223305_at	TMEM216	1.36466	0.0212137
205027_s_at	MAP3K8	1.36109	0.00426678
219984_s_at	HRASLS	1.35632	0.00095578
223484_at	C15orf48	1.35354	0.0344575
203439_s_at	STC2	1.35058	0.00427047
213790_at	ADAM12	1.33402	0.0371399
212811_x_at	SLC1A4	1.32331	0.0254978
242324_x_at	CCBE1	1.31436	0.0432816
227285_at	C1orf51	1.31026	0.0204265
225056_at	SIPA1L2	1.30908	0.0213621
220283_at	HHIPL2	1.30659	0.0035498
206157_at	PTX3	1.3004	0.0284683
230441_at	PLEKHG4B	1.29278	0.0323574
210038_at	PRKCQ	1.28472	0.0340683
203921_at	CHST2	1.27861	0.0180617
214992_s_at	DNASE2	1.27279	0.0116876
216222_s_at	MYO10	1.25873	0.00753602
229357_at	ADAMTS5	1.24489	0.0147024
225387_at	TSPAN5	1.24166	0.0146442
1554026_a_at	MYO10	1.23163	0.0217125
219474_at	C3orf52	1.22895	0.0217085
228176_at	S1PR3	1.22879	0.0186239
231396_s_at	FAM126A	1.22687	0.0110815
213125_at	OLFML2B	1.22619	0.0334983
212387_at	TCF4	1.22564	0.0252765
232001_at	LOC439949	1.21804	0.0136118
219935_at	ADAMTS5	1.21653	0.00955299
1558930_at	LINC00460	1.20572	0.0109207
208727_s_at	CDC42	1.20212	0.00114016
230966_at	IL4I1	1.20109	0.00718104
1556629_a_at	SNAP25	1.19845	0.0201234
209909_s_at	TGFB2	1.19779	0.024743
204964_s_at	SSPN	1.19737	0.0130626
231842_at	KIAA1462	1.19682	0.0368992
213256_at		1.1908	0.0394051
213640_s_at	LOX	1.17982	0.0157458
239598_s_at	LPCAT2	1.17963	0.031301
208790_s_at	PTRF	1.17699	0.0176372
241871_at	CAMK4	1.17551	0.00550821
206348_s_at	PDK3	1.17075	0.0129428
204669_s_at	RNF24	1.16621	0.0176555
223594_at	TMEM117	1.16532	0.0174823
235318_at	FBN1	1.1604	0.0196413
244640_at	ZNF850	1.15861	0.0237719
226237_at	COL8A1	1.15643	0.0457249
203939_at	NT5E	1.14627	0.045281
204048_s_at	PHACTR2	1.14168	0.000628085
218051_s_at	NT5DC2	1.12747	0.00901163
219631_at	LRP12	1.12698	0.02116
210042_s_at	CTSZ	1.12499	0.0414056
223625_at	FAM126A	1.1161	0.00884208
232701_at		1.10662	0.0315827
1556190_s_at	LOC100507516///PRNP	1.10362	0.0331695
225316_at	MFSD2A	1.10007	0.00506566
205282_at	LRP8	1.09725	0.0278117
206307_s_at	FOXD1	1.0948	0.0116438
229088_at	ENPP1	1.09109	0.0310004
227947_at	PHACTR2	1.08833	0.00290149
229055_at	GPR68	1.08828	0.00678148
215728_s_at	ACOT7	1.07854	0.00855571
200935_at	CALR	1.07446	0.00833448
207992_s_at	AMPD3	1.06557	0.0235931
210841_s_at	NRP2	1.0643	0.0213158
220658_s_at	ARNTL2	1.06186	0.00284787
220198_s_at	EIF5A2	1.05501	0.000458168
207147_at	DLX2	1.05373	0.0214262
202345_s_at	FABP5	1.05245	0.000115219
201976_s_at	MYO10	1.05232	0.00172736
210567_s_at	SKP2	1.05211	0.0298521
1554168_a_at	SH3KBP1	1.05142	0.0325835
203471_s_at	PLEK	1.05098	0.0195777
202566_s_at	SVIL	1.0497	0.0349005
223185_s_at	BHLHE41	1.04697	0.0083821
1555759_a_at	CCL5	1.04515	0.0344904
220651_s_at	MCM10	1.04451	0.0141518
231823_s_at	SH3PXD2B	1.03864	0.0177653
222646_s_at	ERO1L	1.03721	0.00151474
229824_at	SHC3	1.03599	0.0313929
219249_s_at	FKBP10	1.03551	0.0196817
212878_s_at	KLC1	1.03241	0.0240525
210706_s_at	RNF24	1.02863	0.0112715
204047_s_at	PHACTR2	1.0264	0.00029284
212850_s_at	LRP4	1.01981	0.047792
220975_s_at	C1QTNF1	1.01705	0.0313095
207891_s_at	HAUS7///TREX2	1.01574	0.0114302
212810_s_at	SLC1A4	1.01176	0.0396003
204440_at	CD83	1.01089	0.0173915
58916_at	KCTD14///NDUFC2-KCTD14	1.00627	0.0202367
220178_at	MFSD12	0.997221	0.00438459
204507_s_at	PPP3R1	0.995437	0.0236624
220407_s_at	TGFB2	0.995436	0.03744
201485_s_at	RCN2	0.99485	0.0368185
222454_s_at	PARVA	0.993014	0.013676
220750_s_at	LEPRE1	0.992541	0.0114172
211573_x_at	TGM2	0.991937	0.0102931
208002_s_at	ACOT7	0.990313	0.00796865
203276_at	LMNB1	0.99009	0.0432479
225571_at	LIFR	0.989083	0.0134233
1561615_s_at	SLC8A1	0.987193	0.0227128
204337_at	RGS4	0.986069	0.0168128
242649_x_at	HMGN2P46	0.985498	0.0417122
204049_s_at	PHACTR2	0.984886	0.00343994
226370_at	KLHL15	0.984691	0.00736627
229610_at	CKAP2L	0.983484	0.00416059
205139_s_at	UST	0.982829	0.0378045
200697_at	HK1	0.982483	0.00118355
227405_s_at	FZD8	0.980872	0.0394451
244774_at	PHACTR2	0.980329	0.0408181
208103_s_at	ANP32E	0.979281	0.0148162
228910_at	CD82	0.972577	0.0108664
218084_x_at	FXYD5	0.972434	0.0205576
211814_s_at	CCNE2	0.970762	0.0325583
203904_x_at	CD82	0.967422	0.0231787
219390_at	FKBP14	0.96542	0.00628798
219545_at	KCTD14///NDUFC2-KCTD14	0.962733	0.0229334
221957_at	PDK3	0.962564	0.0229101
239694_at	TRIM7	0.962348	0.0270284
208433_s_at	LRP8	0.960537	0.0273388
227376_at	GLI3	0.959251	0.0457796
201287_s_at	SDC1	0.95911	0.0496021
222946_s_at	C1orf135	0.958749	0.00519666
201389_at	ITGA5	0.957332	0.0422786
204527_at	MYO5A	0.953227	0.0243177
226955_at	AFAP1L1	0.951546	0.048929
241022_at		0.951004	0.0278332
205846_at	PTPRB	0.949129	0.00108644
219093_at	PID1	0.948954	0.00682247
236328_at	ZFP112///ZNF285	0.943524	0.011496
239288_at	TNIK	0.942373	0.0407677
213937_s_at	FTSJ1	0.939945	0.00313222
224252_s_at	FXYD5	0.935067	0.0213996
207075_at	NLRP3	0.933144	0.0124135
212473_s_at	MICAL2	0.931017	0.0427899
227970_at	GPR157	0.930176	0.0240366
224204_x_at	ARNTL2	0.929044	0.00414321
219229_at	SLCO3A1	0.920801	0.0294768
202565_s_at	SVIL	0.918881	0.0407171
212385_at	TCF4	0.918876	0.0228214
202800_at	SLC1A3	0.918605	0.0160613
229693_at	TMEM220	0.916289	0.039911
227771_at	LIFR	0.91486	0.00530544
201695_s_at	PNP	0.914583	0.0205956
225366_at	PGM2	0.914392	0.00254894
203988_s_at	FUT8	0.90951	0.0159153
218498_s_at	ERO1L	0.907758	0.00680633
235289_at	EIF5A2	0.905112	0.00111696
224325_at	FZD8	0.902145	0.0303432
235296_at	EIF5A2	0.900865	0.000188097
201925_s_at	CD55	0.897366	0.0399608
1554553_s_at	YIF1B	0.897137	0.0112532
205585_at	ETV6	0.895891	0.00171968
209286_at	CDC42EP3	0.892646	0.034141
211519_s_at	KIF2C	0.890141	0.0188862
1552641_s_at	ATAD3A///ATAD3B	0.889744	0.0218428
221912_s_at	CCDC28B	0.888612	0.00250309
205119_s_at	FPR1	0.887621	0.0418475
203856_at	VRK1	0.887486	0.0255204
203297_s_at	JARID2	0.887304	0.0184084
230413_s_at		0.886092	0.0417064
202667_s_at	SLC39A7	0.884755	0.0373409
202660_at	ITPR2	0.884401	0.00571664
209680_s_at	KIFC1	0.882812	0.0341969
231656_x_at	OSBPL10	0.876121	0.0108184
213230_at	CDR2L	0.875641	0.0120297
212239_at	PIK3R1	0.873173	0.00500288
210006_at	ABHD14A	0.864449	0.0289564
37966_at	PARVB	0.862125	0.0195989
225575_at	LIFR	0.861469	0.00703559
204506_at	PPP3R1	0.859838	0.0130847
238694_at	DGKE	0.859265	0.0333429
217312_s_at	COL7A1	0.858625	0.020301
213334_x_at	HAUS7	0.855855	0.00728833
201625_s_at	INSIG1	0.854572	0.0405009
227788_at	USP13	0.854544	3.26255e-05
227468_at	CPT1C	0.853213	0.0302028
219000_s_at	DSCC1	0.851329	0.0301955
204747_at	IFIT3	0.851117	0.0320737
224002_s_at	FKBP7	0.851006	0.0221511
204768_s_at	FEN1	0.851	0.0232099
219687_at	HHAT	0.849824	0.00770538
227247_at	PLEKHA8	0.849664	0.00308937
223452_s_at	ATL3	0.848278	0.0148848
217890_s_at	PARVA	0.847849	0.0120818
222644_s_at	GLT25D1	0.844156	0.0181077
226109_at	C21orf91	0.843676	0.024913
204596_s_at	STC1	0.843435	0.0245744
238575_at	OSBPL6	0.843347	0.0393961
1569190_at	SCLT1	0.84236	0.0105638
212249_at	PIK3R1	0.841601	0.000439445
222833_at	LPCAT2	0.839941	0.0162642
1557938_s_at	PTRF	0.839692	0.0383066
227067_x_at	NOTCH2NL	0.838719	0.00171829
230747_s_at	TTC39C	0.837656	0.00059496
230655_at		0.833569	0.0223605
225388_at	TSPAN5	0.832853	0.0194946
224963_at	SLC26A2	0.83265	0.021113
1569366_a_at	ZNF569	0.831864	0.0238398
218115_at	ASF1B	0.831356	0.0145274
202661_at	ITPR2	0.829114	0.0272237
208875_s_at	PAK2	0.825986	0.0262073
209464_at	AURKB	0.823512	0.0217121
211003_x_at	TGM2	0.8223	0.0264355
219254_at	C17orf101	0.822111	0.00136334
207700_s_at	NCOA3	0.822092	0.0257914
205097_at	SLC26A2	0.819456	0.0148015
209962_at	EPOR	0.817849	0.0120826
211352_s_at	NCOA3	0.81702	0.0382117
226437_at	YIF1B	0.813797	0.01025
219306_at	KIF15	0.813429	0.0316301
227983_at	RILPL2	0.810889	0.00197636
203300_x_at	AP1S2	0.810828	0.0343478
225582_at	ITPRIP	0.808933	0.0298364
203764_at	DLGAP5	0.805717	0.0145627
222269_at	APOOL	0.805086	0.0360936
209060_x_at	NCOA3	0.804028	0.0303935
220941_s_at	C21orf91	0.803741	0.00994869
223738_s_at	PGM2	0.802184	0.0021452
228654_at	SPIN4	0.801736	0.0210552
242465_at	LOC100505592	0.800074	0.0478995
222455_s_at	PARVA	0.799577	0.0331524
205580_s_at	HRH1	0.799245	0.0144604
227068_at	LOC100652805///LOC100653302///PGK1	0.798626	0.0209176
220011_at	C1orf135	0.797013	0.0125387
201673_s_at	GYS1	0.796959	0.0121211
200998_s_at	CKAP4	0.796539	0.0256739
210754_s_at	LYN	0.796409	0.0209891
1555772_a_at	CDC25A	0.796346	0.0115916
207388_s_at	PTGES	0.79582	0.0125646
203348_s_at	ETV5	0.794343	0.0356335
204899_s_at	SAP30	0.791595	0.0195467
203044_at	CHSY1	0.789522	0.0274706
209642_at	BUB1	0.78778	0.0166638
202626_s_at	LYN	0.787644	0.0274681
225367_at	PGM2	0.787065	0.00660954
223586_at	ARNTL2	0.787015	0.00872707
204597_x_at	STC1	0.786291	0.044743
209287_s_at	CDC42EP3	0.78535	0.0424712
235113_at	LRR1	0.784266	0.0071368
228281_at	C11orf82	0.783624	0.00868689
208398_s_at	TBPL1	0.783466	0.000149103
218516_s_at	IMPAD1	0.782759	0.0161668
212141_at	MCM4	0.779432	0.0220942
219650_at	ERCC6L	0.779423	0.00582817
237571_at		0.779311	0.0444159
235421_at	MAP3K8	0.779165	0.0348975
232014_at	ZNF30	0.777732	0.0248945
232352_at	ISL2	0.77699	0.0188882
221696_s_at	STYK1	0.774623	0.0360927
1554930_a_at	FUT8	0.769496	0.0367182
205743_at	STAC	0.768542	0.0128083
207809_s_at	ATP6AP1	0.768358	0.039776
218723_s_at	RGCC	0.766082	0.00495527
218109_s_at	MFSD1	0.764421	0.0452357
209365_s_at	ECM1	0.762533	0.0394493
242939_at	TFDP1	0.762269	0.0476282
242277_at		0.76042	0.0120894
235056_at	ETV6	0.75988	0.0365169
211126_s_at	CSRP2	0.759244	0.0204074
235368_at	ADAMTS5	0.755822	0.0275527
207030_s_at	CSRP2	0.755134	0.0258423
225282_at	SMAP2	0.754666	0.013687
226857_at	ARHGEF19	0.754609	0.00678309
205567_at	CHST1	0.754365	0.0368237
203022_at	RNASEH2A	0.752751	0.0239855
209608_s_at	ACAT2	0.751711	0.0374529
205356_at	USP13	0.75069	0.000357475
212479_s_at	RMND5A	0.749425	0.0392981
225750_at	ERO1L	0.744356	0.00388374
204767_s_at	FEN1	0.743003	0.0243589
200702_s_at	DDX24	0.742684	0.0159152
201040_at	GNAI2	0.741993	0.029311
204629_at	PARVB	0.741939	0.0406747
224793_s_at	TGFBR1	0.741764	0.043096
219715_s_at	TDP1	0.741512	0.0030905
222912_at	ARRB1	0.739661	0.0395853
210113_s_at	NLRP1	0.739084	0.0288955
240421_x_at	SAV1	0.738809	0.0222356
205324_s_at	FTSJ1	0.73862	0.0211872
222747_s_at	SCML1	0.738062	0.0355015
201920_at	SLC20A1	0.738009	0.0122099
218855_at	TPRA1	0.737358	0.0213597
230264_s_at	AP1S2	0.737188	0.0408085
206016_at	CCDC22	0.736443	0.015391
205348_s_at	DYNC1I1	0.735974	0.0084911
202779_s_at	UBE2S	0.735311	0.0254806
203036_s_at	MTSS1	0.734211	0.0380927
200653_s_at	CALM1///CALM2///CALM3	0.73343	0.028133
204789_at	FMNL1	0.730623	0.0356349
206907_at	TNFSF9	0.729326	0.0423092
218770_s_at	TMEM39B	0.728522	0.0188917
53071_s_at	C17orf101	0.727251	0.00618663
1555680_a_at	SMOX	0.727248	0.0265295
208447_s_at	PRPS1	0.725889	0.0118689
1555004_a_at	RBL1	0.722187	0.0468877
218739_at	ABHD5	0.721925	0.0252683
1552335_at	CATSPER1	0.721522	0.0336091
1558517_s_at	LRRC8C	0.721334	0.0321876
206969_at	KRT34///LOC100653049	0.719867	0.0329852
204441_s_at	POLA2	0.719528	0.00860627
212539_at	CHD1L	0.719348	0.0252769
202507_s_at	SNAP25	0.71809	0.0111201
204948_s_at	FST	0.716525	0.00724375
40420_at	STK10	0.715501	0.0249486
213607_x_at	NADK	0.715065	0.0228449
204476_s_at	PC	0.714241	0.0343895
209653_at	KPNA4	0.7134	0.0195428
205805_s_at	ROR1	0.713233	0.0480716
200655_s_at	CALM1///CALM2///CALM3	0.712886	0.0117871
50314_i_at	C20orf27	0.708396	0.0163677
223308_s_at	WDR5	0.707066	0.0213664
226606_s_at	GTPBP5	0.706302	0.0187314
207348_s_at	LIG3	0.705724	0.0474066
208369_s_at	GCDH	0.705443	0.0321407
202854_at	HPRT1	0.704661	0.0339394
203744_at	HMGB3	0.703911	0.00658667
229776_at	SLCO3A1	0.703464	0.0174957
227911_at	ARHGAP28	0.703039	0.0336103
231130_at	FKBP7	0.701589	0.0330354
202828_s_at	MMP14	0.700016	0.0448251
200889_s_at	SSR1	0.698724	0.0107156
206673_at	GPR176	0.698618	0.0210975
1570253_a_at	RHEBL1	0.696395	0.0356058
209514_s_at	RAB27A	0.694939	0.0209915
213805_at	ABHD5	0.694697	0.0463708
202944_at	NAGA	0.694667	0.0352117
228275_at	LOC100505687	0.693853	0.0199037
1561179_s_at	AMZ1	0.693102	0.0412405
200827_at	PLOD1	0.692248	0.0442364
205733_at	BLM	0.69135	0.0442179
209831_x_at	DNASE2	0.691117	0.0437409
212949_at	NCAPH	0.689751	0.0387873
230122_at	MLLT10	0.686522	0.0314822
226140_s_at	OTUD1	0.686225	0.0175504
226308_at	HAUS8	0.686024	0.00900406
201718_s_at	EPB41L2	0.6834	0.0447152
204695_at	CDC25A	0.682402	0.0210917
226902_at	USP13	0.68092	0.00262147
219807_x_at	MIA-RAB4B///RAB4B	0.680645	0.00702585
205579_at	HRH1	0.679889	0.0470461
225651_at	UBE2E2	0.678681	0.0442494
214474_at	PRKAB2	0.678442	0.0047904
202662_s_at	ITPR2	0.678275	0.0365235
207590_s_at	CENPI	0.678106	0.0243118
200929_at	TMED10	0.677386	0.0199173
211911_x_at	HLA-B	0.676787	0.0400571
239792_at	LOC440288	0.676152	0.0356256
218771_at	PANK4	0.675482	0.00986566
200744_s_at	GNB1	0.675303	0.0185176
221972_s_at	SDF4	0.674709	0.031439
209675_s_at	HNRNPUL1	0.672127	0.0376633
203047_at	STK10	0.672087	0.0285476
209563_x_at	CALM1///CALM2///CALM3	0.671542	0.0109444
223413_s_at	LYAR	0.670872	0.0226501
204610_s_at	CCDC85B	0.669904	0.0299445
224470_at	SEC22C	0.668244	0.0276124
218473_s_at	GLT25D1	0.66747	0.0268298
227367_at	SLCO3A1	0.66686	0.0259679
211061_s_at	MGAT2	0.666404	0.00194158
207645_s_at	CHD1L	0.666068	0.0334212
212985_at	APBB2	0.664493	0.0210812
203560_at	GGH	0.66434	0.00344224
1559052_s_at	PAK2	0.662411	0.0369078
1552682_a_at	CASC5	0.661638	0.0331924
210951_x_at	RAB27A	0.661343	0.0187251
205439_at	GSTT2	0.660312	0.0447216
216212_s_at	DKC1///SNORA56	0.658075	0.0237829
1558215_s_at	UBTF	0.656087	0.0488375
220123_at	SLC35F5	0.655083	0.00916381
207124_s_at	GNB5	0.654934	0.0211612
216228_s_at	WDHD1	0.654724	0.0475886
228699_at	NRP2	0.654683	0.042699
203470_s_at	PLEK	0.653136	0.0143057
208977_x_at	TUBB4B	0.652315	0.0401504
209279_s_at	NSDHL	0.652252	0.034677
201761_at	MTHFD2	0.651976	0.0330331
203405_at	PSMG1	0.650826	0.0345328
35150_at	CD40	0.650226	0.0404531
227693_at	WDR20	0.649227	0.0111313
204554_at	PPP1R3D	0.648945	0.0497733
208941_s_at	SEPHS1	0.648509	0.000923316
204324_s_at	GOLIM4	0.647359	0.0335452
222705_s_at	SLC25A15	0.645932	0.0356982
91952_at	DCAF15	0.644589	0.0268102
221335_x_at	SMG9	0.644169	0.0188093
207264_at	KDELR3	0.643968	0.0476987
204459_at	CSTF2	0.642914	0.040025
229106_at	DYNLL2	0.642785	0.0115413
200656_s_at	P4HB	0.642388	0.0243357
204065_at	CHST10	0.642289	0.0180735
219526_at	C14orf169	0.641951	0.0395465
238583_at	MSRB3	0.641468	0.0157882
215708_s_at	LOC100653079///PRIM2	0.640874	0.0330554
225025_at	IGSF8	0.640746	0.0305979
218717_s_at	LEPREL1	0.640263	0.0215491
206173_x_at	GABPB1	0.639876	0.011402
223769_x_at	HYI	0.639487	0.0297998
1554438_at	KIAA1217	0.639291	0.00936845
221435_x_at	HYI	0.639057	0.0439674
1554127_s_at	MSRB3	0.638663	0.0383139
1562789_at	ZNF229	0.638447	0.0460928
202895_s_at	SIRPA	0.637245	0.0490185
37965_at	PARVB	0.637007	0.0387741
224785_at	FAM100B	0.636818	0.0214421
221269_s_at	SH3BGRL3	0.636176	0.0124136
225790_at	MSRB3	0.635444	0.0290209
222479_s_at	DYNC1LI1	0.633626	0.00111731
211822_s_at	NLRP1	0.633316	0.0453564
203311_s_at	ARF6	0.632916	0.0196384
207223_s_at	PTBP3	0.630306	0.0384586
1552485_at	LACTB	0.629736	0.0320416
219544_at	BORA	0.628651	0.0465899
204555_s_at	PPP1R3D	0.628078	0.0218641
1552937_s_at	ATRIP	0.62803	0.000747612
1552256_a_at	SCARB1	0.627949	0.0496055
223094_s_at	ANKH	0.627374	0.0496366
239719_at	CD109	0.626072	0.0419965
224747_at	UBE2Q2	0.625592	0.0156468
236798_at	LOC100505687	0.624086	0.0436329
218619_s_at	SUV39H1	0.623755	0.00797859
203879_at	PIK3CD	0.622738	0.0431469
209408_at	KIF2C	0.621557	0.0297501
225099_at	FBXO45	0.621286	0.0113086
225454_at	CCDC124	0.619852	0.0397115
1564651_at	C6orf228	0.618595	0.0416286
204136_at	COL7A1	0.618158	0.0352399
212901_s_at	CSTF2T	0.617399	0.0289095
229555_at	GALNT5	0.612793	0.0419379
201611_s_at	ICMT	0.61214	0.0342528
233110_s_at	BCL2L12	0.610056	0.009069
1552562_at	ZNF570	0.609783	0.0454323
239431_at	TICAM2///TMED7-TICAM2	0.609557	0.0381684
203102_s_at	MGAT2	0.609062	0.00839042
209440_at	PRPS1	0.608409	0.00530579
228786_at	LOC387647	0.605312	0.00361595
206599_at	SLC16A5	0.605198	0.0331454
204338_s_at	RGS4	0.604685	0.0161986
205449_at	SAC3D1	0.602926	0.0483773
228558_at	C14orf80	0.602271	0.0104303
204092_s_at	AURKA	0.601452	0.00898158
1552977_a_at	CNPY3	0.60134	0.0458642
209166_s_at	MAN2B1	0.601196	0.0412303
235773_at	ZIK1	0.599844	0.0111399
1558027_s_at	PRKAB2	0.599476	0.0158798
204728_s_at	WDHD1	0.598867	0.0376652
214804_at	CENPI	0.598832	0.0479827
231959_at	LIN52	0.596754	0.00482966
218399_s_at	CDCA4	0.596607	0.0369546
223092_at	ANKH	0.595331	0.0499227
222026_at	RBM3	0.595291	0.0148288
211968_s_at	HSP90AA1	0.595008	0.00889053
225766_s_at	TNPO1	0.594969	0.0302466
227904_at	AZI2	0.594882	0.00947273
207439_s_at	SLC35A2	0.594111	0.0306236
225800_at	JAZF1	0.593869	0.0215649
225798_at	JAZF1	0.593741	0.039047
210048_at	NAPG	0.593363	0.0185101
218832_x_at	ARRB1	0.592338	0.0221597
218355_at	KIF4A	0.590817	0.0404247
208840_s_at	G3BP2	0.589395	0.0481712
209750_at	NR1D2	0.589249	0.0324562
215613_at	ADAM12	0.5888	0.0228529
210001_s_at	SOCS1	0.588362	0.0158547
201554_x_at	GYG1	0.587752	0.0362062
207181_s_at	CASP7	0.585405	0.0169155
225930_at	NKIRAS1	0.585075	0.00936889
201126_s_at	MGAT1	0.58504	0.0173776
201924_at	AFF1	-0.585108	0.0102962
1565577_s_at		-0.585193	0.0148092
1555723_at		-0.587677	0.00940594
228469_at	PPID	-0.588004	0.00281508
242818_x_at		-0.588727	0.000325021
1566229_a_at		-0.588757	0.0243162
1553103_at	NFX1	-0.589218	0.0119792
210849_s_at	VPS41	-0.589477	0.0208241
205194_at	PSPH	-0.590298	0.0206217
217939_s_at	AFTPH	-0.590959	0.00348047
241388_at		-0.591427	0.0347919
1558969_a_at	RPL32P3	-0.591771	0.0145587
225020_at	DAB2IP	-0.592846	0.017518
233112_at		-0.59303	0.0486157
228590_at	PTCD3	-0.593386	0.000512503
226969_at	MTR	-0.594133	0.0284711
225444_at	UBN2	-0.594465	0.0367712
240221_at	CSNK1A1	-0.594567	0.0438728
205250_s_at	CEP290	-0.594871	0.0393756
201399_s_at	TRAM1	-0.596092	0.0422808
228316_at	C2orf63	-0.597182	0.026661
212421_at	KIAA0930	-0.597609	0.0152995
225053_at	CNOT7	-0.599499	0.00251437
212611_at	DTX4	-0.600967	0.0313542
227968_at	PDDC1	-0.601009	0.0032159
241728_at		-0.601178	0.017276
209296_at	PPM1B	-0.601777	0.0200537
225704_at	FBRSL1	-0.602431	0.0495337
230174_at	LYPLAL1	-0.606057	0.0315269
236194_at		-0.606321	0.0168897
220898_at		-0.606354	0.0443761
230131_x_at	ARSD	-0.606436	0.0246886
216135_at	IQCK	-0.606874	0.049642
40569_at	MZF1	-0.607639	0.0136465
226239_at	TMEM150A	-0.607833	0.0382177
235174_s_at	LOC100128822	-0.608139	0.0395472
229066_at		-0.609627	0.00715822
230168_at		-0.610918	0.0330836
228465_at		-0.612025	0.0481461
228130_at	ZSCAN30	-0.612217	0.0180978
205848_at	GAS2	-0.612294	0.0234111
210891_s_at	GTF2I///GTF2IP1///LOC100093631	-0.612387	0.024617
213178_s_at	MAPK8IP3	-0.612389	0.0264174
213082_s_at	SLC35D2	-0.612394	0.0450825
214132_at	ATP5C1	-0.612825	0.0424887
224413_s_at	TM2D2	-0.614589	0.0328659
201838_s_at	SUPT7L	-0.615356	0.00589433
230057_at	LOC285178	-0.615943	0.0444216
235125_x_at	FAM73A	-0.618033	0.0238778
214808_at		-0.618191	0.0414761
1569898_a_at	LOC100132707	-0.619533	0.0419073
213083_at	SLC35D2	-0.619814	0.0291474
227969_at	PCBP1-AS1	-0.620538	0.00312122
229930_at	LOC100134361	-0.620837	0.0151491
228168_at	ATP5G3	-0.621022	0.0159861
236728_at	LNPEP	-0.622055	0.00543963
1558078_at		-0.622103	0.0363749
227144_at	KIAA0930	-0.622563	0.00469467
212795_at	KIAA1033	-0.623542	0.0398642
229699_at	LOC100129550	-0.623583	0.0424246
235675_at	DHFRL1	-0.623877	0.0215064
228320_x_at	CCDC64	-0.624567	0.0247365
228596_at	LOC728377	-0.625493	0.0467192
240324_at		-0.626898	0.0125613
222472_at	AFTPH	-0.627745	0.0126656
219359_at	ATHL1	-0.628044	0.000872046
217202_s_at	GLUL	-0.628304	0.0436436
226450_at	INSR	-0.628314	0.0372228
228084_at	PLA2G12A	-0.628569	0.0113668
213437_at	RUFY3	-0.628875	0.0257528
208760_at	UBE2I	-0.628943	0.0329393
230808_at	FNTA	-0.632182	0.0194413
244397_at		-0.632895	0.0013215
244271_at		-0.633038	0.0240674
218471_s_at	BBS1	-0.634125	0.0378391
214910_s_at	APOM	-0.634327	0.0150929
231806_s_at	STK36	-0.634886	0.014625
238601_at	PHKB	-0.635667	0.00731179
227359_at	OSCP1	-0.637053	0.0447562
203464_s_at	EPN2	-0.637822	0.00520599
1554704_at	ATP8B3	-0.638503	0.0276156
232975_at	HCG18	-0.638698	0.0299424
1554447_at	JPX	-0.639865	0.0156621
238767_at		-0.640591	0.00278882
244114_x_at		-0.640846	0.0155378
224517_at	POLR2J4	-0.641066	0.0306164
221869_at	ZNF512B	-0.641488	0.0109418
228101_at	APBA1	-0.641847	0.0480284
242968_at		-0.641873	0.0428122
224476_s_at	MESP1	-0.642575	0.0339059
226252_at		-0.642922	0.0470924
222164_at	FGFR1	-0.643483	0.0482659
228411_at	PARD3B	-0.644671	0.0447918
235893_at		-0.644818	0.0323647
232768_at	CCNB2	-0.644991	0.0394345
1556938_a_at		-0.645165	0.0146042
227865_at	IDNK	-0.645497	0.0307214
235374_at	MDH1	-0.650856	0.0466278
231207_at		-0.65387	0.0456386
65472_at	C2orf68	-0.654026	0.00152636
242323_at	PLA2G12A	-0.654077	0.00605172
240873_x_at	DAB2	-0.654588	0.0208338
203713_s_at	LLGL2	-0.654801	0.009033
213842_x_at	NSUN5P1///NSUN5P2	-0.655247	0.0172001
81811_at		-0.656532	0.0355531
218518_at	FAM13B	-0.656789	0.026101
219188_s_at	MACROD1	-0.657164	0.0411502
221951_at	TMEM80	-0.657971	0.00219701
225804_at	CYB5D2	-0.658103	0.04523
219136_s_at	LMF1	-0.660909	0.0212812
229283_at	LOC728613	-0.66107	0.0386483
225588_s_at	TMEM129	-0.661089	0.0127745
235957_at	GRIP1	-0.661443	0.0367239
223633_s_at		-0.664825	0.0435448
241395_at	NIT1	-0.665297	0.0160573
1554508_at	PIK3AP1	-0.665371	0.0289519
225589_at	SH3RF1	-0.66575	0.00318099
226844_at	MOB3B	-0.666199	0.044654
222234_s_at	DBNDD1	-0.668545	0.0145492
222025_s_at	OPLAH	-0.66914	0.0458174
224910_at	CARHSP1	-0.669472	0.00895062
229425_at		-0.670212	0.00285959
224261_at		-0.670416	0.00874229
213058_at	TTC28	-0.671372	0.0470949
212576_at	MGRN1	-0.675433	0.049905
235314_at	RPL32P3	-0.676575	0.00711734
228157_at	ZNF207	-0.677403	0.01556
214894_x_at	MACF1	-0.678688	0.0332623
215549_x_at	CTAGE4///CTAGE8///CTAGE9	-0.680003	0.00549273
1557521_a_at		-0.680378	0.0271384
203323_at	CAV2	-0.680967	0.0451589
238456_at	LOC100289230	-0.681071	0.015855
242289_at		-0.682332	0.00767354
236521_at		-0.684114	0.0130093
60815_at	POLR2J4	-0.684169	0.023538
202724_s_at	FOXO1	-0.687863	0.0477585
208633_s_at	MACF1	-0.688091	0.0407882
216000_at		-0.688515	0.00159616
228813_at	HDAC4	-0.689684	0.0118107
214486_x_at	CFLAR	-0.69108	0.0286133
213509_x_at	CES2	-0.69112	0.0360534
201836_s_at	SUPT7L	-0.692372	0.00594414
206492_at	FHIT	-0.693109	0.0219201
235482_at	PCBP1-AS1	-0.693737	0.00404207
208634_s_at	MACF1	-0.694055	0.015618
1564757_a_at	CCDC148	-0.694416	0.00708275
238412_at	RRN3P3	-0.69622	0.0215363
1555326_a_at	ADAM9	-0.697109	0.0144019
228738_at	D2HGDH	-0.700743	0.0205309
214100_x_at	NSUN5P1	-0.703427	0.00583601
230104_s_at	TPPP	-0.703836	0.0292771
205871_at	PLGLA///PLGLB1///PLGLB2	-0.70435	0.00679998
211026_s_at	MGLL	-0.704714	0.0320066
1555845_at		-0.704846	0.00587851
239347_at		-0.706853	0.00101227
225193_at	KIAA1967	-0.707641	0.00491382
217610_at	SPDYE2	-0.708384	0.0307242
231437_at	SLC35D2	-0.709984	0.0346299
231876_at	TRIM56	-0.713493	0.0360084
229949_at		-0.713693	0.0399544
1569500_at		-0.715665	0.00463254
226148_at	ZBTB44	-0.717059	0.0403172
242462_at	LOC100506930	-0.717837	0.0274084
223000_s_at	F11R	-0.718381	0.02791
226216_at	INSR	-0.71896	0.00913144
210619_s_at	HYAL1	-0.719846	0.0449164
228020_at	PTCD3	-0.722058	0.000745509
232609_at	CRB3	-0.723413	0.0354786
226040_at		-0.72361	0.023159
235231_at	ZNF789	-0.724465	0.0155685
1554483_at	TMEM37	-0.725569	0.0370115
211862_x_at	CFLAR	-0.725631	0.028163
223797_at	PRO2852	-0.726045	0.00557846
212774_at	ZNF238	-0.726882	0.0106082
210761_s_at	GRB7	-0.727167	0.0117464
215222_x_at	MACF1	-0.727889	0.03103
236663_at		-0.728265	0.0337056
1555878_at	RPS24	-0.729361	0.0165763
239146_at	CLDND1	-0.731146	0.0336998
235625_at	VPS41	-0.731305	0.00320232
210733_at		-0.731386	0.0183484
244312_at		-0.732836	0.0386822
222787_s_at	TMEM106B	-0.73364	0.0160912
1557522_x_at		-0.734804	0.0252935
209508_x_at	CFLAR	-0.735904	0.00912984
213460_x_at	NSUN5P2	-0.736617	0.0128971
234488_s_at	GMCL1///GMCL1P1	-0.738626	0.0230154
214415_at	PLGLA///PLGLB1///PLGLB2	-0.73925	0.0192108
207605_x_at	ZNF117	-0.739456	0.0104736
207437_at	NOVA1	-0.740738	0.0110056
221792_at	RAB6B	-0.742304	0.0418432
223179_at	YPEL3	-0.743321	0.0464536
219664_s_at	DECR2	-0.744212	0.00986849
226166_x_at	STK36	-0.744428	0.00102799
212598_at	WDFY3	-0.748511	0.0211891
226333_at	IL6R	-0.748614	0.0325628
228710_at		-0.749374	0.00334915
215130_s_at	IQCK	-0.749403	0.0179753
213750_at	RSL1D1	-0.749793	0.00908773
208451_s_at	C4A///C4B///LOC100293534	-0.750338	0.0060155
225949_at	LOC100653301///NRBP2	-0.751188	0.015
207358_x_at	MACF1	-0.754173	0.0105607
219880_at	LOC100507619	-0.757775	0.0128092
1552496_a_at	COBL	-0.760693	0.0307264
203567_s_at	TRIM38	-0.760744	0.0331175
224361_s_at	IL17RB	-0.761328	0.0255128
229816_at	WDR78	-0.762503	0.0161417
229315_at		-0.762566	0.00213391
214428_x_at	C4A///C4B///LOC100293534	-0.763537	0.00366108
233019_at	CNOT7	-0.766588	0.0333335
235078_at		-0.766653	0.0143835
229163_at		-0.76685	0.036715
243224_at		-0.767721	0.0315609
1555846_a_at		-0.768127	0.00226654
209667_at	CES2	-0.769331	0.0417896
213158_at		-0.769508	0.0355939
202552_s_at	CRIM1	-0.769586	0.00688739
239667_at	SLC3A1	-0.770354	0.0161092
213670_x_at	NSUN5P1	-0.7715	0.00628157
227172_at	TMEM116	-0.772036	0.0136289
243735_at	ELP2	-0.774109	0.0374208
228040_at	MGC21881	-0.774319	0.0120984
222282_at		-0.774923	0.0299043
238608_at		-0.775909	0.016916
1561631_at		-0.775951	0.0022652
244532_x_at		-0.776157	0.0388939
236340_at	C7orf13///LOC100506380	-0.776379	0.0277975
208498_s_at	ACTG1P4///AMY1A///AMY1B///AMY1C///AMY2A///AMY2B	-0.776452	0.00291584
211317_s_at	CFLAR	-0.778052	0.0254884
238000_at		-0.78007	0.02493
235308_at	ZBTB20	-0.781146	0.0386967
1569469_a_at	LHX8	-0.781312	0.0370616
1555363_s_at	LOC284440	-0.781423	0.045737
226220_at	METTL9	-0.782562	0.0256751
218458_at	GMCL1	-0.783319	0.0367621
209403_at	LOC100510707///TBC1D3///TBC1D3B///TBC1D3C///TBC1D3F///TBC1D3G///TBC1D3H	-0.783685	0.0188334
212606_at	WDFY3	-0.784566	0.00446414
230795_at		-0.784649	0.031789
242021_at	XBP1	-0.785164	0.0408749
1569867_at	EME2	-0.786661	0.00687949
203568_s_at	TRIM38	-0.787077	0.0319355
236553_at	LOC100507520	-0.78723	0.0288032
228464_at	MIR3685	-0.790042	0.0191543
204672_s_at	ANKRD6	-0.790734	0.0411793
219527_at		-0.79214	0.032574
205826_at	MYOM2	-0.793628	0.013543
211316_x_at	CFLAR	-0.794495	0.00288569
202834_at	AGT	-0.794693	0.0454768
220753_s_at	CRYL1	-0.795306	0.0350315
234079_at		-0.797507	0.0168935
226877_at	RPL32P3	-0.797585	0.0249102
211458_s_at	GABARAPL1///GABARAPL3	-0.797769	0.0453951
1556646_at		-0.801068	0.000545562
219341_at	CLN8	-0.80127	0.0150225
229958_at	CLN8	-0.803057	0.0303233
228971_at		-0.803379	0.0371923
232964_at	SPDYE1///SPDYE5	-0.803504	0.0360882
227052_at		-0.804385	0.0305605
1560741_at	SNRPN///SNURF	-0.804442	0.020002
229603_at	BBS12	-0.804457	0.0368698
244304_at	DIS3L2	-0.805615	0.0244109
218032_at	SNN	-0.805631	0.00271418
228496_s_at	CRIM1	-0.806012	0.0155145
227955_s_at	EFNA5	-0.806126	0.0410635
207733_x_at	PSG9	-0.806339	0.0440701
228108_at	PPM1L	-0.807032	0.0260936
219317_at	POLI	-0.8071	0.0342312
226939_at	CPEB2	-0.807675	0.0178981
1558281_a_at	TMEM184A	-0.807958	0.0169394
235507_at	PCMTD1	-0.808193	0.0451662
230198_at		-0.808272	0.00223506
236875_at	LOC100130705	-0.809076	0.00735533
227556_at	NME7	-0.809482	0.0150123
211466_at	NFIB	-0.810449	0.00450905
238191_at		-0.816088	0.00537305
1569868_s_at	EME2	-0.81638	0.0066972
236679_x_at		-0.818215	0.0445906
214919_s_at	ANKHD1///ANKHD1-EIF4EBP3///EIF4EBP3	-0.818229	0.00749164
241757_x_at	DYNC2LI1	-0.818995	0.0125616
224999_at	EGFR	-0.821134	0.0497665
227431_at	RSBN1L-AS1	-0.822437	0.013926
228160_at	LOC339290	-0.823015	0.0122124
239355_at	GMCL1	-0.82552	0.0152826
213033_s_at	NFIB	-0.826257	0.0379706
235581_at		-0.827053	0.0343857
203106_s_at	VPS41	-0.827943	0.0283471
231252_at	KANSL1L	-0.828288	0.0183986
1569003_at	VMP1	-0.830313	0.0409499
1565597_at		-0.831365	0.01275
1553971_a_at	GATS	-0.832535	0.0338471
228927_at	ZNF397	-0.833078	0.00586537
218785_s_at	RABL5	-0.833695	0.0140462
236278_at	HIST1H3E	-0.83555	0.0256268
241497_at		-0.83691	0.00302931
231828_at	LOC253039	-0.837356	0.0227805
1568617_a_at	CAMSAP3	-0.837903	0.00367484
235965_at		-0.838797	0.0375935
243431_at		-0.840782	0.0429632
238440_at	CLYBL	-0.843824	0.0305849
219562_at	RAB26	-0.844634	0.0468312
205222_at	EHHADH	-0.846236	0.0284382
220119_at	EPB41L4A	-0.847828	0.00286296
228150_at	SEC16B	-0.847905	0.0425986
218983_at	C1RL	-0.849401	0.0239588
225906_at		-0.851908	0.015029
232594_at	HSBP1L1	-0.85203	0.0337786
229589_x_at	BIVM	-0.852077	0.0283934
227837_at	LOC729570	-0.853301	0.000341079
1553145_at	FLJ39653	-0.854345	0.00931436
57540_at	RBKS	-0.856614	0.0432701
202551_s_at	CRIM1	-0.858005	0.00379384
204981_at	SLC22A18	-0.859597	0.0362628
1565598_at		-0.859869	0.0490855
238526_at	RAB3IP	-0.860438	0.0120469
244193_at	DNAJC22	-0.862039	0.0228435
225177_at	RAB11FIP1	-0.86207	0.0473552
222714_s_at	LACTB2	-0.863948	0.0182809
240908_at	LOC100507153	-0.864215	0.0411707
219789_at	NPR3	-0.865938	0.0336587
226179_at	SLC25A37	-0.867295	0.0422825
210409_at	MLLT4-AS1	-0.869519	0.0251961
238854_at	LOC100506668	-0.870684	0.00511024
239017_at		-0.871151	0.00679523
238756_at	GAS2L3	-0.875354	0.0262685
226986_at	WIPI2	-0.877473	0.0213054
212980_at	USP34	-0.877509	0.0253994
235305_s_at	ECHDC2	-0.877731	0.0143865
231790_at	DMGDH	-0.879725	0.0138524
239944_at		-0.885329	0.0412861
209695_at	PTP4A3	-0.885701	0.0127164
214355_x_at	CTAGE15P///CTAGE4///CTAGE6P///CTAGE8///CTAGE9	-0.888411	0.000551887
229238_at	C17orf97	-0.88976	0.0369253
223695_s_at	ARSD	-0.8914	0.0204674
228243_at		-0.892965	0.0104483
205145_s_at	MYL5	-0.894692	0.0154619
223712_at	PCBD2	-0.895797	0.0259286
235709_at	GAS2L3	-0.897899	0.00765293
207717_s_at	PKP2	-0.900566	0.0347885
229372_at	GOLT1A	-0.901765	0.0313436
232382_s_at	PCMTD1	-0.903412	0.0400618
230559_x_at	FGD4	-0.905995	0.00120072
219831_at	CDKL3	-0.906223	0.0325221
229334_at	RUFY3	-0.907374	0.0281021
221897_at	TRIM52	-0.913949	0.00977287
225525_at	KIAA1671	-0.915478	0.00440267
223514_at	CARD11	-0.918024	0.0273648
232541_at		-0.918268	0.0251058
227095_at	LEPROT	-0.922979	0.0352252
225564_at	SPATA13	-0.923365	0.00915296
220120_s_at	EPB41L4A	-0.923691	0.0234799
229435_at	GLIS3	-0.923751	0.00986139
233255_s_at	BIVM	-0.925359	0.0369553
228925_at	ADAM1	-0.926027	0.0451026
214036_at	EFNA5	-0.92965	0.0239942
1555175_a_at	PBLD	-0.93043	0.00868038
1568780_at		-0.933736	0.00791385
228529_at	NAA38	-0.9345	0.0121779
1553099_at	TIGD1	-0.935623	0.00113173
1569703_a_at		-0.938472	0.0156826
1555533_at	QRFPR	-0.939422	0.0231712
230435_at	FAM228B	-0.939685	0.0181809
227112_at	TMCC1	-0.954818	0.0199567
238477_at	KIF1C	-0.955325	0.0276545
243237_at		-0.957509	0.0437978
244035_at		-0.959025	0.0139485
220987_s_at	AKIP1///NUAK2	-0.961231	0.0159359
218701_at	LACTB2	-0.961457	0.0208017
240502_at		-0.963793	0.020548
225810_at	MTMR10	-0.964131	0.00346165
229258_at	KIF12	-0.964184	0.00123365
242577_at	LOC389834	-0.966474	0.0394505
243465_at		-0.967357	0.0152931
222761_at	BIVM	-0.969339	0.0284837
1554003_at	RGNEF	-0.970459	0.040465
203407_at	PPL	-0.970823	0.040754
213351_s_at	TMCC1	-0.975338	0.0304338
213392_at	IQCK	-0.976983	0.0156143
209911_x_at	HIST1H2BD	-0.977348	0.0454794
239647_at	CHST13	-0.977616	0.00664571
235587_at	LOC202781	-0.983418	0.0228885
222380_s_at	PDCD6	-0.984058	0.0354496
235483_at	STX3	-0.98451	0.034445
235803_at		-0.985627	0.0111937
228125_at	ZSCAN30	-0.992487	0.00460622
240688_at	MGST1	-0.995074	0.0198748
242539_at	DIS3L2	-1.00128	0.015165
233198_at	GOLGA2P5	-1.0017	0.0351831
219455_at	C7orf63	-1.0028	0.0262899
209290_s_at	NFIB	-1.00861	0.02994
237301_at		-1.0091	0.0198859
219277_s_at	OGDHL	-1.01015	0.0280213
227072_at	RTTN	-1.01217	0.0355325
231982_at	C19orf77	-1.0125	0.0483549
218066_at	SLC12A7	-1.01667	0.0365141
208135_at	HNF1B	-1.01847	0.0395835
1557487_at		-1.0188	0.00937156
243996_at		-1.01944	0.0065363
203139_at	DAPK1	-1.02615	0.0489355
242310_at		-1.02688	0.0237553
227330_x_at	LOC100233156///MAFIP///TEKT4P2	-1.02826	0.0456023
201693_s_at	EGR1	-1.03059	0.0089109
1555900_at		-1.03093	0.00197951
1554250_s_at	TRIM73	-1.03101	0.0195144
239580_at	GUCY1A3	-1.03347	0.0230753
226444_at		-1.03385	0.0126406
238774_at		-1.03397	0.0140729
207456_at	HNF4G	-1.03446	0.0399602
218552_at	ECHDC2	-1.03797	0.0188353
230388_s_at	KANSL1-AS1	-1.0399	0.00668097
229705_at	PIK3C3	-1.04426	0.0147914
227839_at	MBD5	-1.04539	0.0338132
236636_at		-1.04879	0.032423
205768_s_at	SLC27A2	-1.04944	0.0426012
1552280_at	TIMD4	-1.05815	0.0189136
222662_at	PPP1R3B	-1.05966	0.0349067
204671_s_at	ANKRD6	-1.05997	0.0469126
55872_at	ZNF512B	-1.06134	0.0148635
208436_s_at	IRF7	-1.06332	0.017191
235456_at		-1.06493	0.0276398
215017_s_at	FNBP1L	-1.06517	0.0300922
209691_s_at	DOK4	-1.06561	0.0414189
228802_at	RBPMS2	-1.06681	0.0262972
225299_at	MYO5B	-1.06862	0.0378347
242053_at		-1.07109	0.00158211
221558_s_at	LEF1	-1.07715	0.0188116
1560885_x_at	SLC17A1	-1.07931	0.0233277
228037_at		-1.07997	0.00760004
238853_at	RAB3IP	-1.08244	0.0339442
200648_s_at	GLUL	-1.08567	0.0223784
239162_at	DAPK1-IT1	-1.0863	0.0258971
214705_at	INADL	-1.09049	0.0392631
209289_at	NFIB	-1.09353	0.0220609
221636_s_at		-1.10381	0.012216
213029_at	NFIB	-1.10572	0.0140061
231592_at	TSIX	-1.10763	0.0224854
227417_at		-1.11143	0.00962604
231043_at	PCDP1	-1.11721	0.0188324
242708_at		-1.11836	0.0192582
242239_at		-1.11926	0.0130886
229748_x_at	LOC100233156///MAFIP///TEKT4P2	-1.12698	0.043594
229249_at		-1.12953	0.00718016
218309_at	CAMK2N1	-1.13385	0.0322812
1554791_a_at	KANSL1L	-1.13522	0.00213437
218589_at	LPAR6	-1.13985	0.0208221
226302_at	ATP8B1	-1.14291	0.0262697
211354_s_at	LEPR	-1.14339	0.011822
208083_s_at	ITGB6	-1.14724	0.0412338
204579_at	FGFR4	-1.15457	0.0448339
204137_at	GPR137B	-1.15809	0.0241128
213032_at	NFIB	-1.15922	0.0324592
235274_at		-1.15955	0.0236521
1559410_at		-1.1613	0.00840657
203979_at	CYP27A1	-1.17761	0.0403607
203762_s_at	DYNC2LI1	-1.18453	0.0101005
221747_at	TNS1	-1.18787	0.0342985
235217_at	LOC100216546	-1.18818	0.0045051
227497_at	SOX6	-1.1917	0.0107296
1563386_at		-1.1926	0.0327106
1558692_at	C1orf85	-1.19766	0.0298847
239065_at	DNAJC22	-1.20069	0.0291028
235427_at	CFLAR	-1.20087	0.00416643
1557348_at		-1.20965	0.014703
227948_at	FGD4	-1.21246	0.0115232
218035_s_at	RBM47	-1.21399	0.0459622
233814_at	EFNA5	-1.22731	0.00467999
230791_at		-1.22777	0.0221212
1554485_s_at	TMEM37	-1.23366	0.0409503
244631_at	LOC389834	-1.23947	0.0390859
228391_at	CYP4V2	-1.2402	0.0342804
237083_at		-1.24838	0.00444298
214746_s_at	ZNF467	-1.24963	0.00148035
231399_at	RAB3IP	-1.25166	0.0115536
1555014_x_at		-1.25283	0.0124092
209426_s_at	AMACR///C1QTNF3///C1QTNF3-AMACR	-1.26068	0.0280969
239682_at		-1.27515	0.00172377
211355_x_at	LEPR	-1.28229	0.0038174
203763_at	DYNC2LI1	-1.28938	0.00246672
205602_x_at	PSG7	-1.29112	0.0270429
1568633_a_at		-1.29211	0.0171138
201301_s_at	ANXA4	-1.29686	0.0169529
219543_at	PBLD	-1.29846	0.0143298
212096_s_at	MTUS1	-1.30017	0.0311299
209894_at	LEPR	-1.30926	0.00918641
236656_s_at	LOC100288911	-1.31761	0.0410757
209424_s_at	AMACR///C1QTNF3///C1QTNF3-AMACR	-1.32913	0.0192366
211356_x_at	LEPR	-1.33454	0.00195172
228214_at	SOX6	-1.33681	0.0113865
235771_at		-1.33714	0.0205362
215071_s_at	HIST1H2AC	-1.33955	0.0316109
229851_s_at	C11orf54	-1.34324	0.00159392
232614_at		-1.34768	0.0241822
235165_at	PARD6B	-1.35038	0.0086119
213618_at	ARAP2	-1.35115	0.00626922
233887_at	GPR126	-1.35313	0.0255932
229584_at	LRRK2	-1.35944	0.0363308
243933_at		-1.36105	0.0167841
227614_at	HKDC1	-1.36158	0.0466384
234980_at	TMEM56	-1.36457	0.0446613
1560512_at		-1.36561	0.00496946
215268_at	KIAA0754	-1.36749	0.0024704
219610_at	RGNEF	-1.36861	0.0374831
219263_at	RNF128	-1.38174	0.0124727
229245_at	PLEKHA6	-1.39348	0.00755281
223268_at	C11orf54	-1.39799	0.00169462
230291_s_at	NFIB	-1.40145	0.0120908
213792_s_at	INSR	-1.40457	0.00194276
229377_at	GRTP1	-1.40757	0.00518594
204051_s_at	SFRP4	-1.41329	0.0245697
219195_at	PPARGC1A	-1.41449	0.019239
225671_at	SPNS2	-1.43166	0.0109437
225511_at	GPRC5B	-1.43575	0.0201216
206167_s_at	ARHGAP6	-1.43882	0.0156273
221088_s_at	PPP1R9A	-1.4396	0.0482795
238441_at	PRKAA2	-1.4404	0.0477668
206872_at	SLC17A1	-1.44486	0.0330096
209993_at	ABCB1	-1.4517	0.0467908
222073_at	COL4A3	-1.45573	0.0415724
230561_s_at	KANSL1L	-1.45753	0.000755728
238408_at		-1.45944	0.0145715
230757_at		-1.45949	0.0143334
232395_x_at	AGBL3	-1.46147	0.0120351
213050_at	COBL	-1.46284	0.00402386
215046_at	KANSL1L	-1.4671	0.000875677
241897_at		-1.47898	0.0411807
214308_s_at	HGD	-1.48198	0.0231052
235763_at	SLC44A5	-1.48352	0.0310509
1559706_at	RGNEF	-1.50066	0.00911017
234297_at	RGS8///SDHAP3	-1.52013	0.0486934
221173_at	USH1C	-1.52839	0.012224
229004_at	ADAMTS15	-1.53371	0.0219285
233073_at		-1.54528	0.00325035
232210_at		-1.5499	0.0130386
205794_s_at	NOVA1	-1.56053	0.000325615
207761_s_at	METTL7A	-1.56716	0.0176541
226459_at	PIK3AP1	-1.57165	0.0445941
227180_at	ELOVL7	-1.57499	0.0108647
226145_s_at	FRAS1	-1.60424	0.0342369
201302_at	ANXA4	-1.61028	0.00862467
243168_at		-1.62491	0.0109035
236279_at		-1.62923	0.000845831
220615_s_at	FAR2	-1.63939	0.0289332
222139_at	ERV3-2	-1.64514	0.0125817
228653_at	SAMD5	-1.65436	0.0448726
203157_s_at	GLS	-1.67759	0.0239694
219274_at	TSPAN12	-1.67901	0.0435525
228256_s_at	EPB41L4A	-1.71347	0.0209623
204073_s_at	C11orf9	-1.71666	0.000444379
228494_at	PPP1R9A	-1.7254	0.0394062
232271_at	HNF4G	-1.73344	0.0239118
205304_s_at	KCNJ8	-1.7364	0.040097
205221_at	HGD	-1.74749	0.0136227
208191_x_at	PSG4	-1.7492	0.0238972
209425_at	AMACR///C1QTNF3///C1QTNF3-AMACR	-1.75429	0.00628905
204446_s_at	ALOX5	-1.75916	0.0324158
1568574_x_at	SPP1	-1.7631	0.00553468
226535_at	ITGB6	-1.7683	0.0380714
206852_at	EPHA7	-1.77663	0.0108688
204379_s_at	FGFR3	-1.78713	5.70262e-05
204988_at	FGB	-1.80325	0.0430965
229530_at	GUCY1A3	-1.81574	0.0264921
201694_s_at	EGR1	-1.81807	0.00854823
237049_at		-1.81863	0.0328943
200606_at	DSP	-1.82304	0.0214195
221942_s_at	GUCY1A3	-1.83586	0.0440001
233428_at		-1.84312	0.00429157
242536_at		-1.84962	0.0311612
239108_at		-1.86268	0.0208752
203685_at	BCL2	-1.9038	0.0026659
226482_s_at	TSTD1	-1.91878	0.0217528
231361_at	NLGN1	-1.92308	0.000425659
227235_at	GUCY1A3	-1.9402	0.0167418
227432_s_at		-1.94547	0.00500761
239477_at	EFHB	-1.94835	0.036636
231008_at	UNC5CL	-2.00583	0.000766437
207808_s_at	PROS1	-2.03216	0.00206755
221748_s_at	TNS1	-2.03693	0.0185094
239093_at	HOGA1	-2.05976	0.0231943
205234_at	SLC16A4	-2.08056	0.0222095
227498_at	SOX6	-2.13641	0.00452084
209283_at	CRYAB	-2.14367	0.0306936
238533_at	EPHA7	-2.15667	0.0124639
224589_at	XIST	-2.19458	0.020876
235638_at	RASSF6	-2.21905	0.0230041
227404_s_at	LOC100653132	-2.22512	0.00844824
205893_at	NLGN1	-2.23417	0.000263809
206340_at	NR1H4	-2.28193	0.0242628
205799_s_at	SLC3A1	-2.32784	0.0121566
228919_at		-2.37777	0.00614413
240253_at		-2.39365	0.015794
209598_at	PNMA2	-2.40328	0.00584111
229147_at	RASSF6	-2.40555	0.0271659
230573_at	SGK2	-2.41404	5.65189e-05
206155_at	ABCC2	-2.44395	0.0414024
1554375_a_at	NR1H4	-2.4575	0.0193705
226863_at	FAM110C	-2.50783	0.0141838
211682_x_at	UGT2B28	-2.50807	0.0103443
211184_s_at	USH1C	-2.51151	0.000620414
205380_at	PDZK1	-2.5447	0.0444702
205137_x_at	USH1C	-2.60906	0.000781322
224590_at	XIST	-2.73234	0.0147005
214091_s_at	GPX3	-2.82757	0.00672301
1555564_a_at	CFI	-2.90024	6.33825e-05
229288_at	EPHA7	-2.9314	0.00560523
203854_at	CFI	-3.11663	0.000255175
201348_at	GPX3	-3.14504	0.00917673
214218_s_at	XIST	-3.24737	0.0103282
221728_x_at	XIST	-3.37891	0.0118096
227671_at	XIST	-3.4898	0.0109286
224588_at	XIST	-3.59715	0.0134207
